# Supplementary material
Source: HighWire-hosted journal article supplement (https://jnm.snmjournals.org/highwire/filestream/94945/field_highwire_adjunct_files/0/170076_Supplemental_Data.pdf)
Supplement: 170076_Supplemental_Data.pdf [file 170076_Supplemental_Data.pdf]

**Supplemental Table 1.** ROC curve analysis of PET/CT quantitative indices for predicting recurrence with varying margin thresholds for isocontour VOI

| Index              | Margin threshold        | AUC (95% CI)           | <i>P</i> | Sensitivity (%) | Specificity (%) |
|--------------------|-------------------------|------------------------|----------|-----------------|-----------------|
| MTV <sub>IVC</sub> | TBR <sub>IVC</sub> 2.00 | 0.891<br>(0.818–0.943) | < 0.001  | 90.0            | 78.7            |
|                    | TBR <sub>IVC</sub> 2.25 | 0.871<br>(0.794–0.928) | < 0.001  | 83.3            | 86.2            |
|                    | TBR <sub>IVC</sub> 2.50 | 0.816<br>(0.727–0.881) | < 0.001  | 66.7            | 95.0            |
| MTV <sub>NL</sub>  | TBR <sub>NL</sub> 1.50  | 0.862<br>(0.783–0.920) | < 0.001  | 80.0            | 83.7            |
|                    | TBR <sub>NL</sub> 1.65  | 0.831<br>(0.748–0.896) | < 0.001  | 73.3            | 90.0            |
|                    | TBR <sub>NL</sub> 1.80  | 0.802<br>(0.716–0.872) | < 0.001  | 63.3            | 96.2            |
| UVP <sub>IVC</sub> | TBR <sub>IVC</sub> 2.00 | 0.896<br>(0.824–0.946) | < 0.001  | 90.0            | 81.2            |
|                    | TBR <sub>IVC</sub> 2.25 | 0.872<br>(0.795–0.928) | < 0.001  | 83.3            | 86.2            |
|                    | TBR <sub>IVC</sub> 2.50 | 0.813<br>(0.727–0.881) | < 0.001  | 66.7            | 95.0            |
| UVP <sub>NL</sub>  | TBR <sub>NL</sub> 1.50  | 0.863<br>(0.784–0.921) | < 0.001  | 80.0            | 83.7            |
|                    | TBR <sub>NL</sub> 1.65  | 0.832<br>(0.749–0.897) | < 0.001  | 73.3            | 90.0            |
|                    | TBR <sub>NL</sub> 1.80  | 0.802<br>(0.716–0.872) | < 0.001  | 63.3            | 96.2            |

AUC, area under curve; MTV<sub>IVC</sub>, metabolic tumor volume based on inferior vena cava activity; MTV<sub>NL</sub>, metabolic tumor volume based on normal liver activity; UVP<sub>IVC</sub>, uptake-volume product based on inferior vena cava activity; UVP<sub>NL</sub>, uptake-volume product based on normal liver activity.
